# Supplementary material for: Structure-based rational design, synthesis, crystal structure, DFT and molecular docking of 1,4-benzene dicarboxamide isomers with application as hardeners
Source: Royal Society of Chemistry journal article supplement (doi:10.1039/c9nj01560d), 2019-01-01
Supplement: c9nj01560d1.pdf [file c9nj01560d1.pdf]

## Structure-based rational design, synthesis, crystal structure, DFT and molecular docking of 1,4 benzene dicarboxamide isomers with application as hardeners

MeenuTeotia<sup>a</sup>, NaziaTarannum<sup>a</sup>, MohitChauhan<sup>a</sup>, and Rakesh Kumar Soni<sup>a</sup>

<sup>a</sup>Department of Chemistry, ChaudharyCharan Singh University, Meerut 250004, India

E-mail: [teotiameenu@gmail.com](mailto:teotiameenu@gmail.com), [orcid.org/0000-0001-9833-7821](https://orcid.org/0000-0001-9833-7821), Phone: 09758154719

### New Journal of Chemistry (RSC) Supplementary files

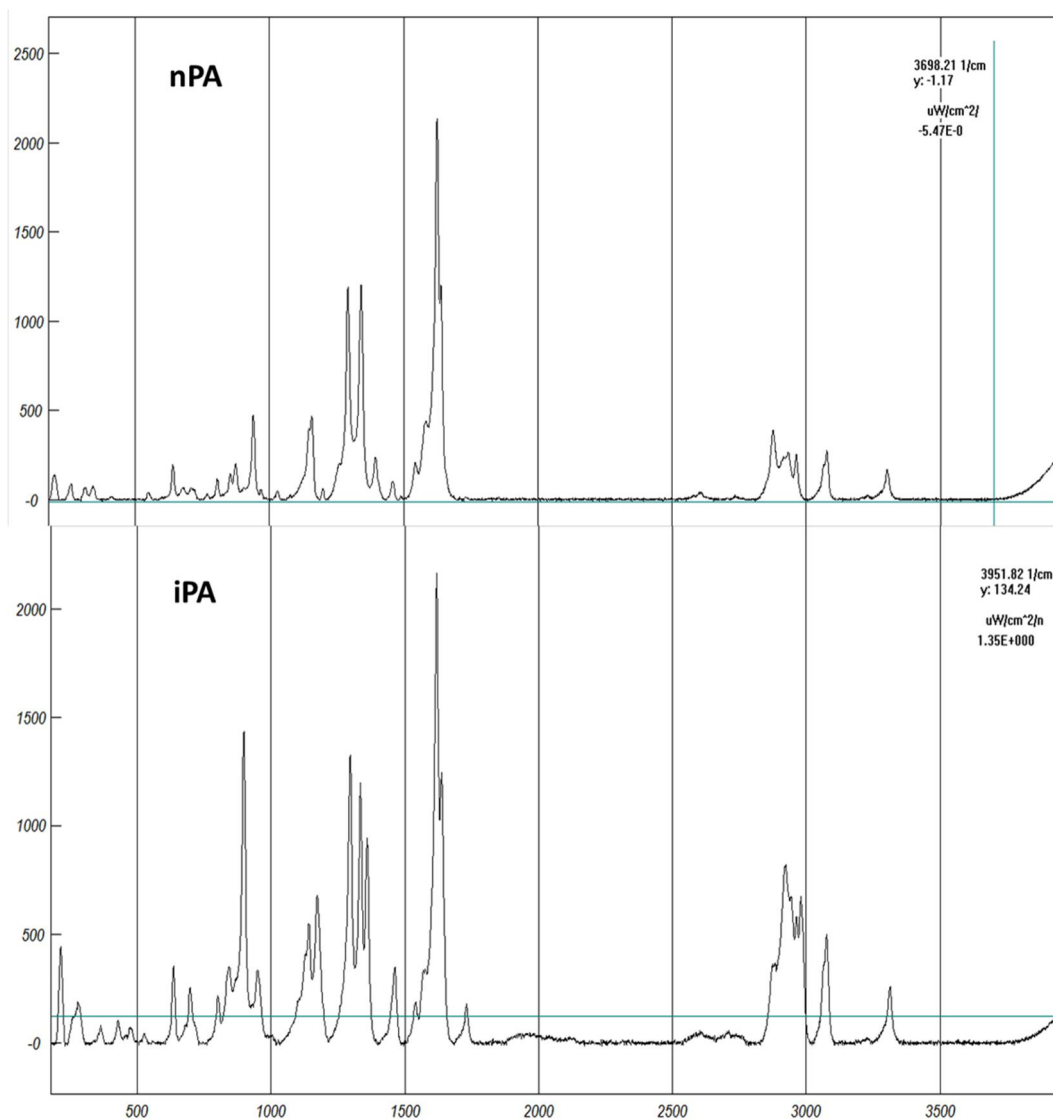

Figure S1: Raman spectra of N, N' di-n-propyl and N, N' di-isopropyl 1,4 benzene dicarboxamides

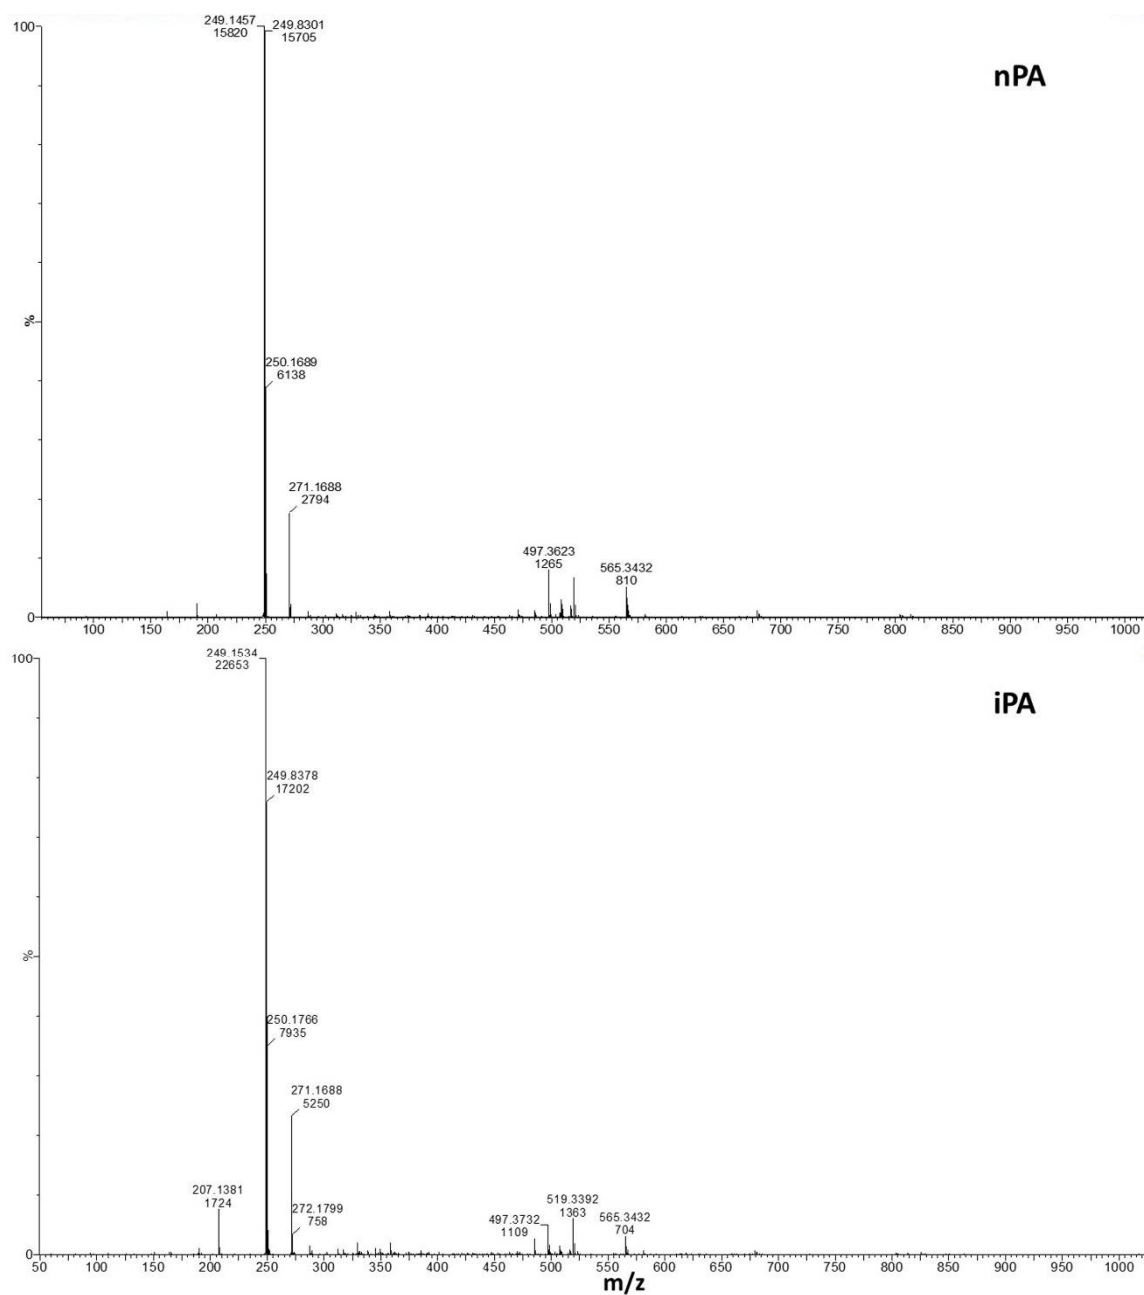

Figure S2: MS spectra of N, N' di n-propyl and N, N' di-isopropyl 1,4 benzene dicarboxamides

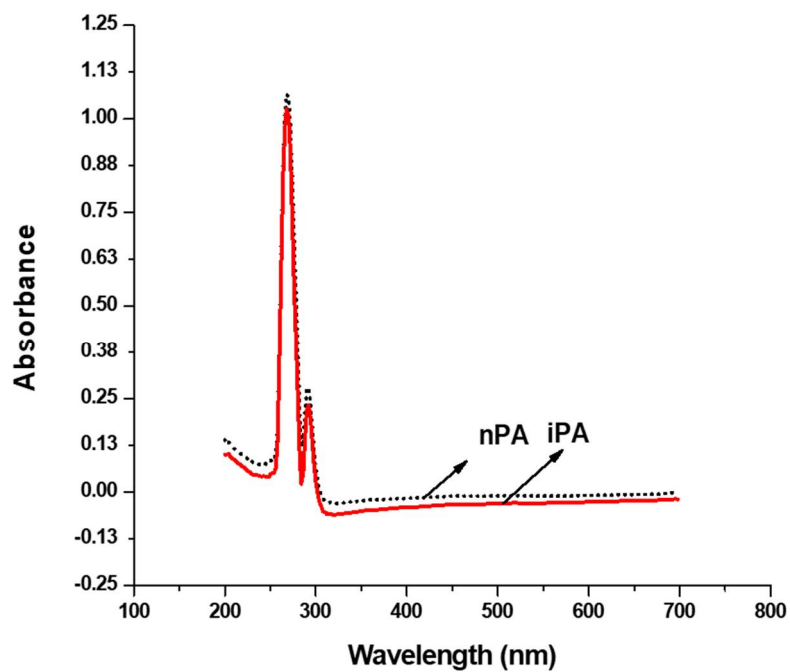

Figure S3: UV-Visible spectra of nPA (N, N' di n-propyl) and iPA (N, N' di-isopropyl) 1,4 benzene dicarboxamides

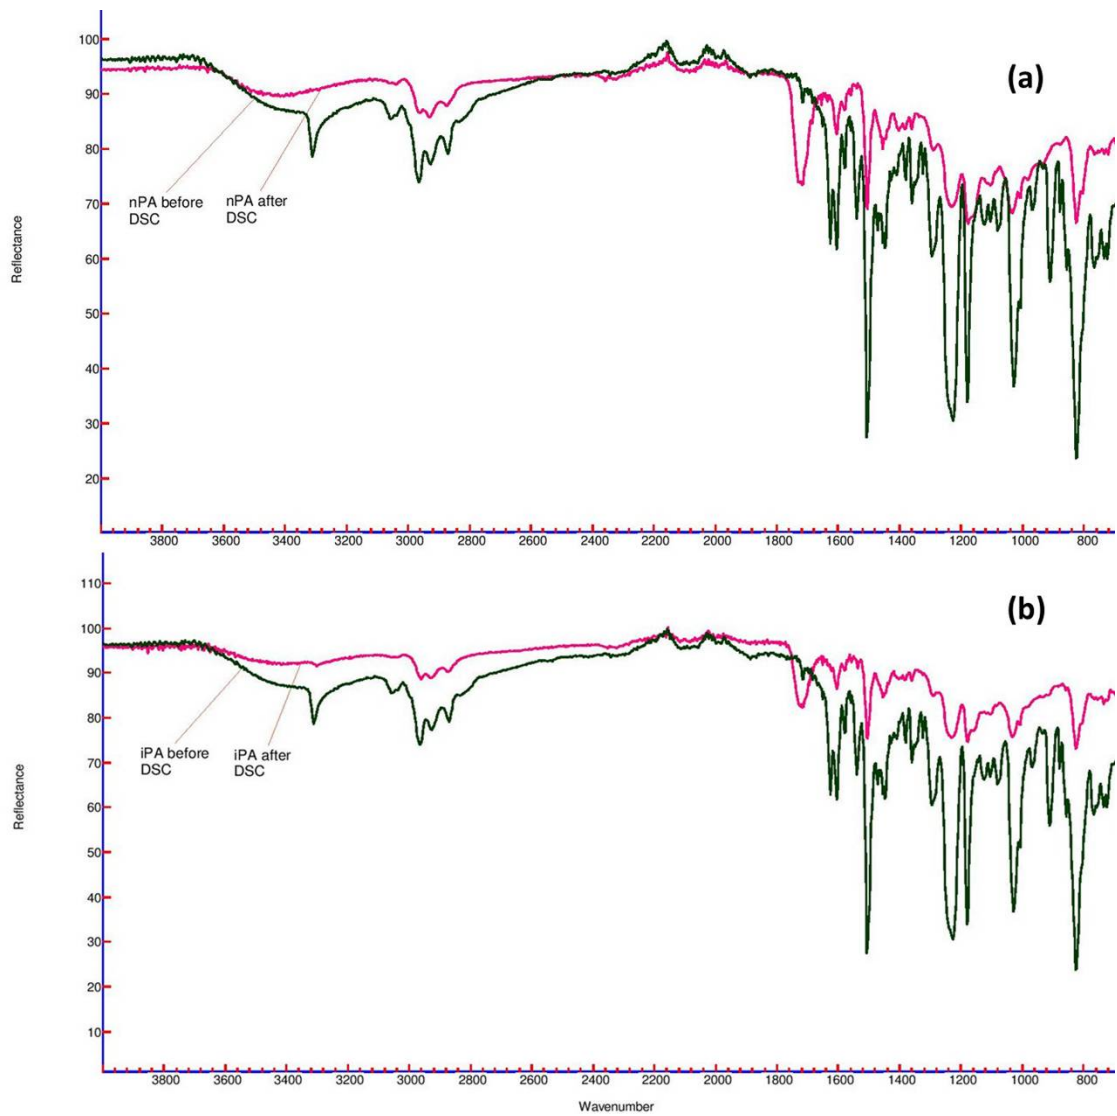

Figure S4: FTIR spectra of uncured and cured FnPA (a) and FiPA (b) formulations

Table S1: Mulliken atomic charges

| Atom No. | Atom | Charge  | Atom No. | Atom | Charge   |
|----------|------|---------|----------|------|----------|
| 1        | C    | -0.1521 | 1        | C    | -0.1537  |
| 2        | C    | -0.1519 | 2        | C    | -0.1556  |
| 3        | C    | 0.0583  | 3        | C    | 0.5768   |
| 4        | C    | -0.1434 | 4        | C    | -0.14542 |
| 5        | C    | -0.1430 | 5        | C    | -0.14514 |
| 6        | C    | 0.0567  | 6        | C    | 0.06133  |
| 7        | H    | 0.1278  | 7        | H    | 0.12882  |
| 8        | H    | 0.1290  | 8        | H    | 0.128712 |
| 9        | H    | 0.1741  | 9        | H    | 0.17422  |
| 10       | H    | 0.1743  | 10       | H    | 0.17508  |
| 11       | C    | 0.4659  | 11       | C    | 0.47832  |
| 12       | C    | 0.4671  | 12       | C    | 0.47376  |
| 13       | O    | -0.4733 | 13       | N    | -0.64311 |
| 14       | O    | -0.4694 | 14       | N    | -0.64425 |
| 15       | N    | -0.6450 | 15       | H    | 0.31077  |
| 16       | N    | -0.6499 | 16       | O    | -0.4761  |
| 17       | H    | 0.3138  | 17       | O    | -0.4775  |
| 18       | H    | 0.3134  | 18       | H    | 0.3156   |
| 19       | C    | -0.0876 | 19       | C    | 0.0562   |
| 20       | C    | -0.0904 | 20       | C    | 0.05146  |
| 21       | H    | 0.1930  | 21       | H    | 0.17681  |
| 22       | H    | 0.1387  | 22       | H    | 0.12493  |
| 23       | H    | 0.1825  | 23       | C    | -0.41741 |
| 24       | H    | 0.1322  | 24       | C    | -0.38959 |
| 25       | C    | -0.2312 | 25       | C    | -0.39534 |
| 26       | C    | -0.2309 | 26       | C    | -0.39678 |
| 27       | H    | 0.1168  | 27       | H    | 0.126488 |
| 28       | H    | 0.1448  | 28       | H    | 0.14818  |
| 29       | H    | 0.1579  | 29       | H    | 0.14732  |
| 30       | H    | 0.1185  | 30       | H    | 0.16875  |
| 31       | C    | -0.4120 | 31       | H    | -0.00443 |
| 32       | H    | 0.1295  | 32       | H    | 0.13405  |
| 33       | H    | 0.1431  | 33       | H    | 0.12235  |
| 34       | H    | 0.1388  | 34       | H    | 0.12934  |
| 35       | C    | -0.4116 | 35       | H    | 0.1267   |
| 36       | H    | 0.1333  | 36       | H    | 0.18349  |
| 37       | H    | 0.1437  | 37       | H    | 0.12942  |
| 38       | H    | 0.1381  | 38       | H    | 0.18474  |

Table S2: Crystallographic data and refinement parameters

|                                   | nPA                                                           | iPA                                                           |
|-----------------------------------|---------------------------------------------------------------|---------------------------------------------------------------|
| Empirical formula                 | C <sub>14</sub> H <sub>20</sub> N <sub>2</sub> O <sub>2</sub> | C <sub>14</sub> H <sub>20</sub> N <sub>2</sub> O <sub>2</sub> |
| Formula weight                    | 248.32                                                        | 248.30                                                        |
| Temperature                       | 296(2) K                                                      | 296(2) K                                                      |
| Wavelength                        | 0.71073 Å                                                     | 0.71073 Å                                                     |
| Crystal system                    | Triclinic                                                     | Triclinic                                                     |
| Space group                       | 2 'P' -1' '-P 1'                                              | 2 'P' -1' '-P 1'                                              |
| Z                                 | 1                                                             | 1                                                             |
| Density (calculated)              | 1.210 Mg/m <sup>3</sup>                                       | 1.189 Mg/m <sup>3</sup>                                       |
| Absorption coefficient            | 0.081 mm <sup>-1</sup>                                        | 0.080 mm <sup>-1</sup>                                        |
| Theta range for data collection   | 2.211 to 25.047°                                              | 3.076 to 25.048°                                              |
| Index ranges                      | 5<=h<=5, -8<=k<=9, -11<=l<=11                                 | 6<=h<=5, -6<=k<=6, -16<=l<=16                                 |
| Reflections collected             | 3419                                                          | 1191                                                          |
| Independent reflections           | 1205 [R(int) = 0.0433]                                        | 723 [R(int) = 0.0476]                                         |
| Refinement method                 | SHELXL-2014/7 (Sheldrick, 2014)                               | SHELXL-2014/7 (Sheldrick, 2014)                               |
| Data / restraints / parameters    | 1205/0/83                                                     | 1191/0/84                                                     |
| Goodness-of-fit on F <sup>2</sup> | 0.919                                                         | 1.307                                                         |
| Final R indices [I>2sigma(I)]     | R1 = 0.0673, wR2 = 0.1600                                     | R1 = 0.0741, wR2 = 0.1488                                     |
| R indices (all data)              | R1 = 0.1157, wR2 = 0.1922                                     | R1 = 0.1386, wR2 = 0.1720                                     |
| Largest diff. peak and hole       | 0.181 and -0.293 e.Å <sup>-3</sup>                            | 0.186 and -0.229 e.Å <sup>-3</sup>                            |
